# Supplementary material
Source: PubMed Central journal article supplement (PMC124142)
Supplement: mbc_13_9_3055__1.pdf [file mbc_13_9_3055__1.pdf]

Table I.

| Gene       | Product size    | Forward primer (5' ->3')  | Reverse primer (5' ->3')  | RCR program                                                    | Accession number |
|------------|-----------------|---------------------------|---------------------------|----------------------------------------------------------------|------------------|
| BMPR-II    | 1539 and 271 bp | CTGCACAGTGTGCTGAGGAAAG    | TGAACTGCCCTGTTACTGCCA     | 35 cycles at 94°C for 15 sec, 55°C for 30 sec, 68°C for 2 min  | NM033346         |
| ActR-IIA   | 434 bp          | GCAAAATGAATACGAAGTCTA     | GCACCCTCTAATACCTCTGGA     | 35 cycles at 94°C for 15 sec, 55°C for 30 sec, 68°C for 1 min  | M93415           |
| ActR-IIB   | 550bp           | ACACGGGAGTGCATCTACTACAACG | TTCATGAGCTGGGCCTTCAGACAC  | 35 cycles at 94°C for 15 sec, 55°C for 30 sec, 68°C for 1 min  | NM_001106        |
| TbR-II     | 587bp           | TCACCTCCATCTGTGAGAAG      | CTGAAGTGTCTGCTTCAGC       | 35 cycles at 94°C for 15 sec, 55°C for 30 sec, 68°C for 1 min  | M85079           |
| endoglin   | 648 bp          | AAGTTTGTCTTGCGCAGTGCTT    | GCGTGTGCGAGTAGATGTACCA    | 35 cycles at 94°C for 15 sec, 55°C for 30 sec, 68°C for 1 min  | BC014271         |
| betaglycan | 955bp           | CAAAGGACCCTGTCAATCCCA     | CATCATGGCCAGATTATCGA      | 35 cycles at 94°C for 15 sec, 55°C for 30 sec, 68°C for 1 min  | L07594           |
| BMP-2      | 550bp           | CCAGAAACGAGTGGGAAAAC      | AAGTCCACGTACAAAGGGTG      | 35 cycles at 94°C for 15 sec, 55°C for 30 sec, 68°C for 1 min  | NM_001200        |
| TGF-b1     | 250bp           | GACTTCCGCAAGGACCTCGGC     | GCGCACGATCATGTTGGACAG     | 35 cycles at 94°C for 15 sec, 55°C for 30 sec, 68°C for 1 min  | A23751           |
| ALK-1      | 332bp           | CTCTACGACTTCTGCAGAG       | CCACTTGTAGGACTCAAAGC      | 35 cycles at 94°C for 15 sec, 55°C for 30 sec, 68°C for 1 min  | Z22533           |
| ALK-2      | 703bp           | ATGTCTTTTAGCCTGCCTGCTG    | ATCAAGCTGATTGGTGCTCTGG    | 35 cycles at 94°C for 15 sec, 60°C for 30 sec, 72 °C for 1 min | Z22534           |
| ALK-3      | 400bp           | TGATTTGGAACAGGATGAAGC     | TGTAGCACATTCAGGAAGTC      | 35 cycles at 94°C for 15 sec, 60°C for 30 sec, 72 °C for 1 min | Z22535           |
| ALK-5      | 544bp           | TCGCCCTTTTATTTCAGAGGGTACT | ACAGCAAGTTCATTCTTCTTTACC  | 35 cycles at 94°C for 15 sec, 55°C for 30 sec, 68°C for 1 min  | L11695           |
| ALK-6      | 634bp           | GCAGCACAGACGGATATTGT      | TTTCATGCCTCATCAACACT      | 35 cycles at 94°C for 15 sec, 55°C for 30 sec, 68°C for 1 min  | U89326           |
| Smad1      | 300bp           | TGCCACTCAACGCCACTTTT      | TCATAAGCAACCGCCTGAACAT    | 35 cycles at 94°C for 15 sec, 55°C for 30 sec, 68°C for 1 min  | U59423           |
| Smad2      | 524 bp          | CCCATCGAAAAGGATTGCCACA    | TGCATGGAAGTTTCTCCAACC     | 35 cycles at 94°C for 15 sec, 55°C for 30 sec, 68°C for 1 min  | AF027964         |
| Smad3      | 416 bp          | GGACGACTACAGCCATTCCA      | TTCCGATGTGTCTCCGTGTCA     | 35 cycles at 94°C for 15 sec, 55°C for 30 sec, 68°C for 1 min  | NM_005902        |
| Smad4      | 714 bp          | CTTTGAAATGGATGTTTCAG      | CATCCTGATAAGGTTAAGGG      | 40 cycles at 94°C for 15 sec, 55°C for 30 sec, 68°C for 1 min  | NM_005359        |
| Smad5      | 319bp           | ACGTCAATGGCCAGCTTGTT      | TCCAACGGCTTTAGCTCATGA     | 35 cycles at 94°C for 15 sec, 55°C for 30 sec, 68°C for 1 min  | NM_005903        |
| b-actin    | 395bp           | TGGCACCACACCTTCTACAATGAGC | GCACAGCTTCTCCTTAATGTCACGC | 35 cycles at 94°C for 15 sec, 55°C for 30 sec, 68°C for 1 min  | BC016045         |
